# Supplementary material for: Effects of Container Design on the Temperature and Moisture Content Distribution in Pork Patties during Microwave Heating: Experiment and Numerical Simulation
Source: MDPI journal article supplement (doi:10.3390/pr10112382), 2022-11-13
Supplement: s1 [file s1]

## Supplementary Material

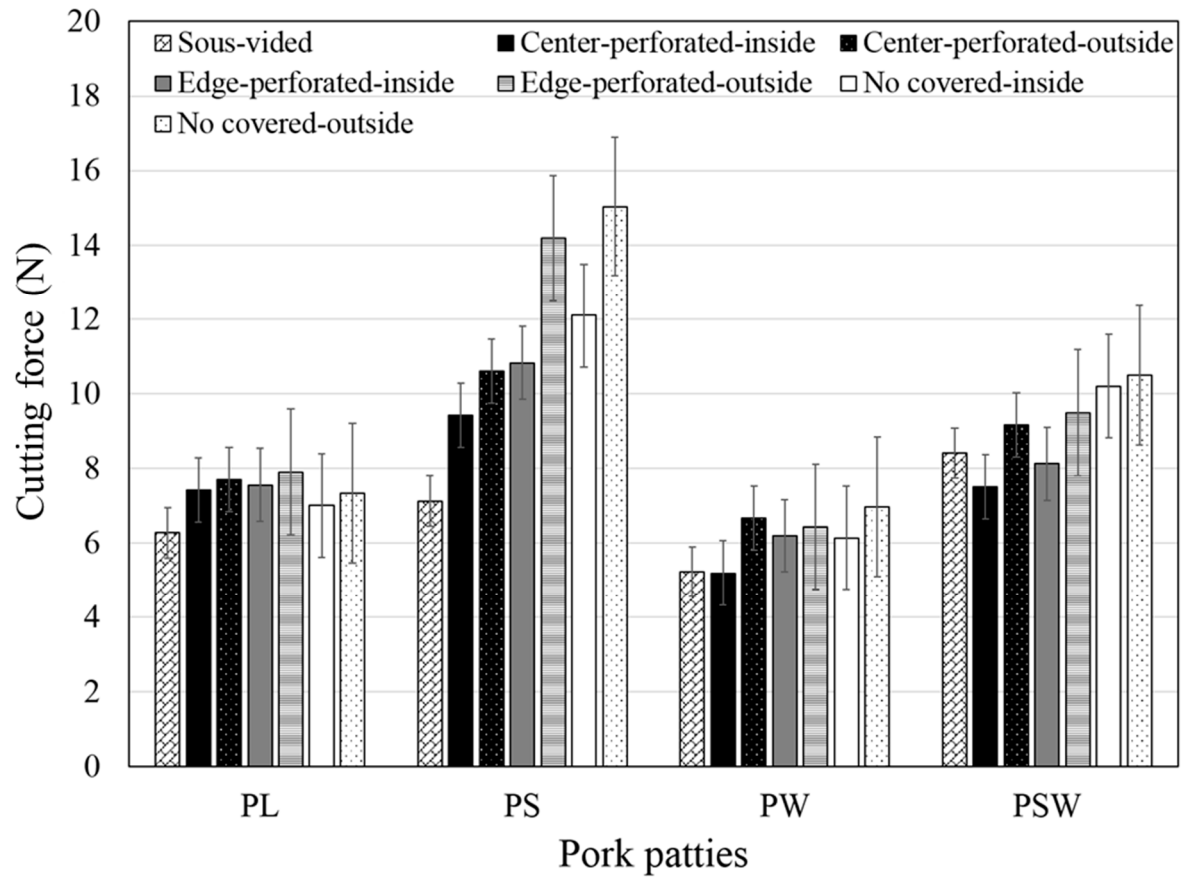

Figure S1. Cutting force of pork patties before and after microwave heating.
